# Supplementary material
Source: PubMed Central journal article supplement (PMC7228808)
Supplement: NIHMS1568963-supplement-2.pdf [file NIHMS1568963-supplement-2.pdf]

**A****Utility Discounting**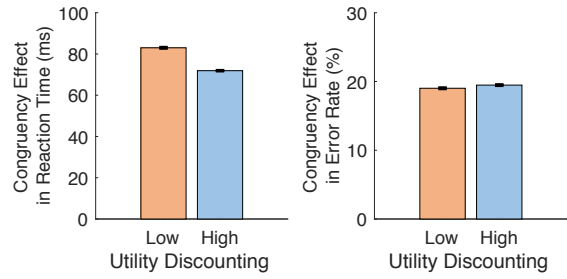**B****Expected Task Difficulty (Lower Range)**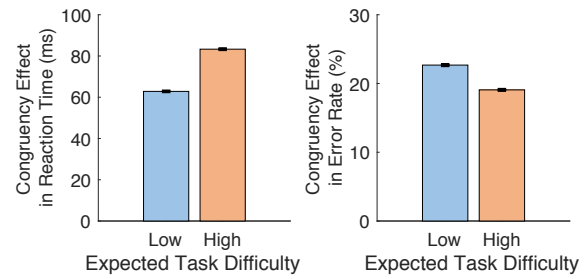**C****Expected Task Difficulty (Upper Range)**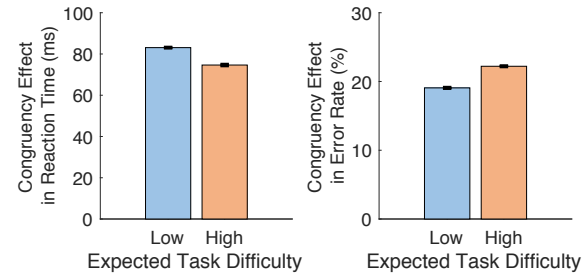**D****Cost of Control**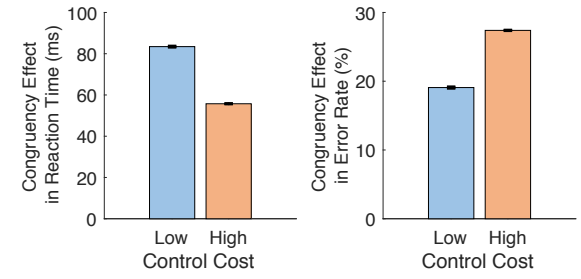**E****Control Intensity**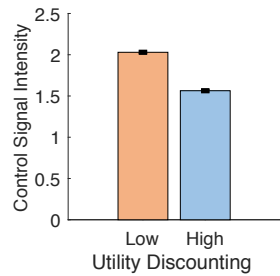**F**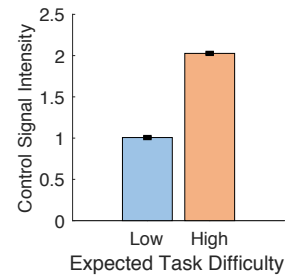**G**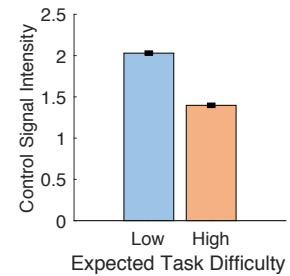**H**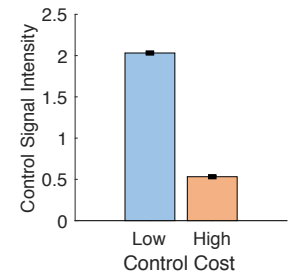
 Neutral Mood

 Positive Mood
