# Supplementary material
Source: PubMed Central journal article supplement (PMC7228808)

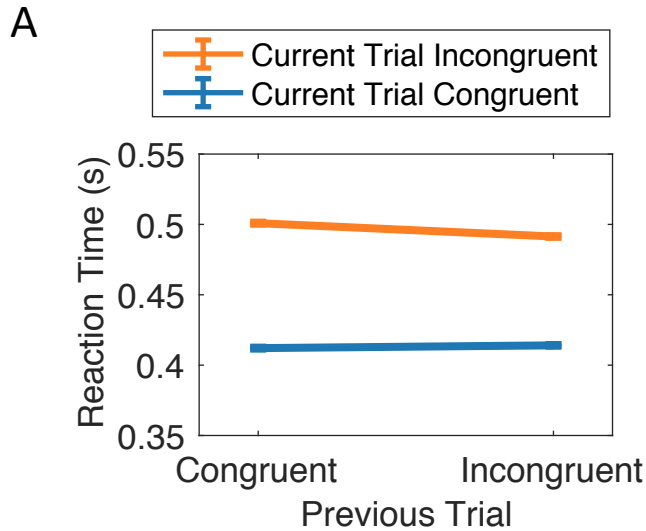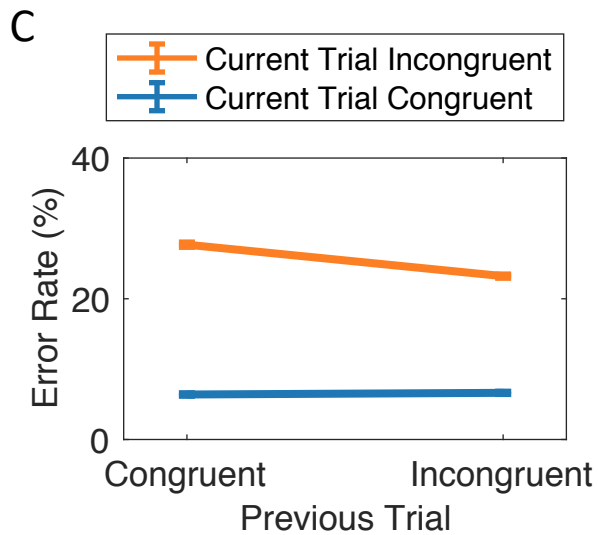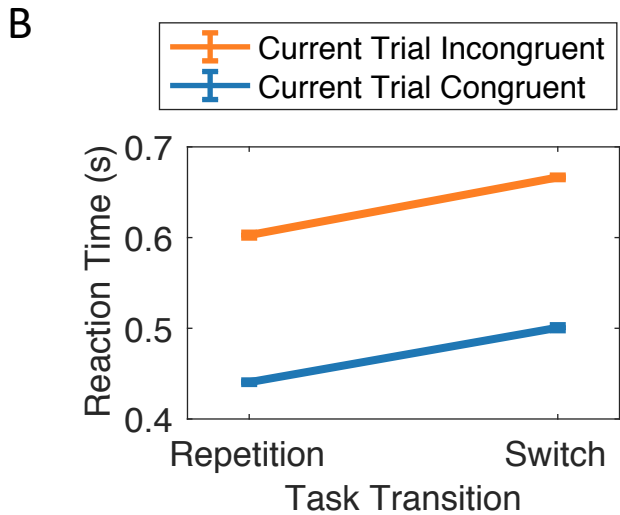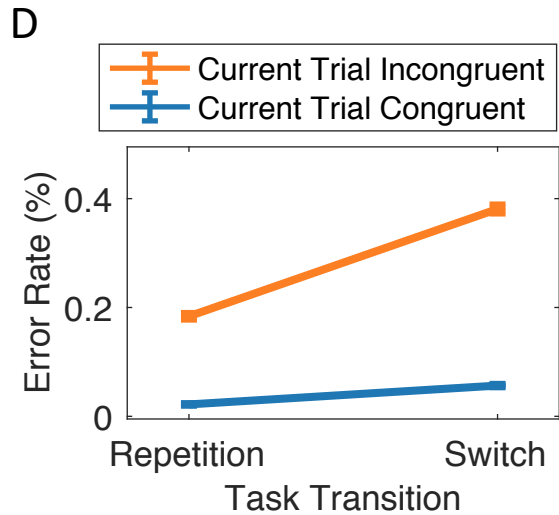

Supplement: NIHMS1568963-supplement-1.pdf [file NIHMS1568963-supplement-1.pdf]

**A**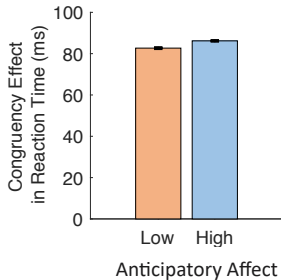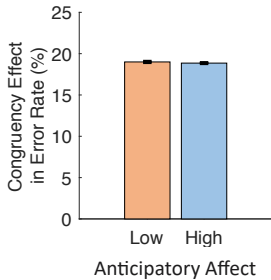**B**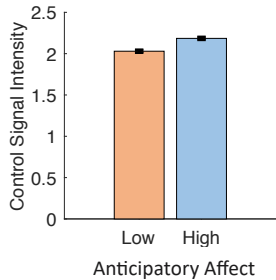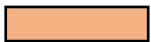

Low Anticipatory Affect

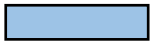

High Anticipatory Affect

Supplement: NIHMS1568963-supplement-3.pdf [file NIHMS1568963-supplement-3.pdf]
